# Supplementary material for: Dynamics of SARS-CoV-2 infection hospitalisation and infection fatality ratios over 23 months in England
Source: PLoS Biol. 2023 May 25;21(5):e3002118. doi: 10.1371/journal.pbio.3002118 (PMC10212114; doi:10.1371/journal.pbio.3002118)
Supplement: S2 Table — (XLSX) [file pbio.3002118.s002.xlsx]

## Sheet: SupplementaryTable2_final
							Correlation (P-value)
	Data		Age		Time lag		Rounds 1-7					Rounds 8-13					Rounds 14-19
	Deaths		All		26 (fit to rounds 1-7)		0.984813	(	<0.001	)		0.984118	(	<0.001	)		0.731601	(	<0.001	)
					18 (fit to rounds 14-19)		0.952993	(	<0.001	)		0.965439	(	<0.001	)		0.894731	(	<0.001	)
			64 and under		24 (fit to rounds 1-7)		0.985549	(	<0.001	)		0.966663	(	<0.001	)		-0.05913	(	0.398532	)
					16 (fit to rounds 14-19)		0.946435	(	<0.001	)		0.962001	(	<0.001	)		0.16934	(	0.0149621	)
			65 and over		24 (fit to rounds 1-7)		0.95272	(	<0.001	)		0.995088	(	<0.001	)		0.776622	(	<0.001	)
					19 (fit to rounds 14-19)		0.937734	(	<0.001	)		0.987451	(	<0.001	)		0.870031	(	<0.001	)
	Hospitalisations		All		19 (fit to rounds 1-7)		0.978033	(	<0.001	)		0.982492	(	<0.001	)		0.757056	(	<0.001	)
					7 (fit to rounds 14-19)		0.902713	(	<0.001	)		0.970614	(	<0.001	)		0.955373	(	<0.001	)
			64 and under		17 (fit to rounds 1-7)		0.98627	(	<0.001	)		0.965291	(	<0.001	)		0.595924	(	<0.001	)
					6 (fit to rounds 14-19)		0.926919	(	<0.001	)		0.980607	(	<0.001	)		0.84922	(	<0.001	)
			65 and over		18 (fit to rounds 1-7)		0.946197	(	<0.001	)		0.992983	(	<0.001	)		0.830466	(	<0.001	)
					9 (fit to rounds 14-19)		0.897733	(	<0.001	)		0.96665	(	<0.001	)		0.958513	(	<0.001	)
